# Supplementary material for: Why Couldn't the COVID-19 Epidemics Be Managed? In the Context of Complexity Science,A Solution Framework: Global Cooperation, Regional Policies, and Local Intervention
Source: Research Square preprint supplement (doi:10.21203/rs.3.rs-960364/v1), 2021-10-19
Supplement: Supplementary file 1 [file a39e6383235ba960260df448.xlsx]

## Sheet: general
Country	cases	deaths	age	pop	lexp	gdp_pp	sch
Afghanistan	163.94	7.07	17.17	38041754	64.8	2202	3.9
Albania	4587.95	84.61	34.903	2854191	78.6	13962	10.1
Algeria	286.16	7.71	27.456	43053054	76.9	11350	8
Angola	93.67	2.06	16.38	31825295	61.1	6654	5.2
Antigua and Barbuda	1267.24	33.7	32.558	97118	77	21908	9.3
Argentina	7317.69	156.04	30.512	44938712	76.7	22034	10.9
Armenia	7462.76	146.66	33.823	2957731	75.1	13654	11.3
Australia	117.56	3.57	37.217	25364307	83.4	49756	12.7
Austria	7116.73	114.91	43.221	8877067	81.5	56352	12.5
Azerbaijan	3257.36	47.26	30.315	10023318	73	14404	10.6
Bahamas	2854.46	56.2	30.858	389482	73.9	35783	11.4
Bahrain	11904	44.19	31.164	1641172	77.3	45026	9.5
Bangladesh	474.14	7.4	25.725	163046161	72.6	4754	6.2
Barbados	1380.77	16.01	39.009	287025	79.2	15639	10.6
Belarus	3995.33	28.69	39.52	9466856	74.8	19150	12.3
Belgium	8964.2	214.56	41.34	11484055	81.6	51708	12.1
Belize	3197.46	81.23	23.657	390353	74.6	7005	9.9
Benin	65.86	0.83	18.247	11801151	61.8	3287	3.8
Bhutan	167.96	0.13	25.741	763092	71.8	11345	4.1
Bolivia (Plurinational State of)	2849.02	115.8	24.122	11513100	71.5	8724	9
Bosnia and Herzegovina	6171.94	275.88	40.681	3301000	77.4	14895	9.8
Botswana	2267.28	32.91	22.97	2303697	69.6	17766	9.6
Brazil	7352.05	205	31.368	211049527	75.9	14652	8
Brunei Darussalam	53.03	0.69	29.89	433285	75.9	62100	9.1
Bulgaria	5968.07	249.49	43.375	6975761	75	23091	11.4
Burkina Faso	64.09	0.78	17.036	20321378	61.6	2190	1.6
Burundi	36.61	0.05	17.148	11530580	61.6	752	3.3
Cabo Verde	5086.63	45.14	25.075	549935	73	7172	6.3
Cambodia	134.84	0.92	23.95	16486542	69.8	4389	5
Cameroon	291.68	4.48	18.207	25876380	59.3	3653	6.3
Canada	3520.15	66.1	40.401	37589262	82.4	49031	13.4
Central African Republic	145.14	1.99	17.057	4745185	53.3	945	4.3
Chad	29.86	1.05	15.973	15946876	54.2	1580	2.5
Chile	6759.17	146.13	33.837	18952038	80.2	24226	10.6
China	7.12	0.33	36.701	1397715000	76.9	16117	8.1
Colombia	6128.63	159.78	29.479	50339443	77.3	14731	8.5
Comoros	452.28	16.79	19.707	850886	64.3	3081	5.1
Congo	205.56	2.68	18.933	5380508	64.6	3298	6.5
Costa Rica	5639.92	70.53	31.248	5047561	80.3	19642	8.7
Croatia	8649.16	191.34	43.099	4067500	78.5	28509	11.4
Cyprus	8021.46	39.08	34.949	1198575	81	39545	12.2
Czechia	15468.8	279.91	41.431	10669709	79.4	40314	12.7
Democratic Republic of the Congo	34.18	0.87	16.777	86790567	60.7	1098	6.8
Denmark	4591.27	42.99	41.603	5818553	80.9	57184	12.6
Djibouti	1156.28	15.28	25.01	973560	67.1	5519	4.1
Dominican Republic	2561.96	33.08	26.462	10738958	74.1	18419	8.1
Ecuador	2328.79	112.15	26.496	17373662	77	11375	8.9
Egypt	241.28	14.06	24.279	100388073	72	11763	7.4
El Salvador	1102.02	33.78	25.686	6453553	73.3	8776	6.9
Equatorial Guinea	548.4	7.98	22.129	1355986	58.7	18558	5.9
Estonia	9593.85	92.48	41.567	1326590	78.8	36710	13.1
Ethiopia	231.94	3.49	18.331	112078730	66.6	2220	2.9
Fiji	19.41	0.45	26.952	889953	67.4	13853	10.9
Finland	1630.77	16.85	42.452	5520314	81.9	48621	12.8
France	8895.92	164.58	41.247	67059887	82.7	46184	11.5
Gabon	1074.21	6.51	22.339	2172579	66.5	14870	8.7
Gambia	246.5	7.24	17.509	2347706	62	2207	3.9
Georgia	8333.58	112.78	37.693	3720382	73.8	15014	13.1
Germany	4332.33	103.86	45.898	83132799	81.3	53815	14.2
Ghana	300.37	2.52	20.735	30417856	64.1	5413	7.3
Greece	3531.12	107.02	43.35	10716322	82.2	30315	10.6
Grenada	143.08	0.89	30.557	112003	72.4	17242	9
Guatemala	1348.15	44.06	21.253	16604026	74.3	8638	6.6
Guinea	173.38	1.16	17.135	12771246	61.6	2564	2.8
Guinea-Bissau	190.35	3.4	18.442	1920922	58.3	1989	3.6
Guyana	1941.51	43.35	24.982	782766	69.9	9703	8.5
Haiti	118.57	2.4	22.724	11263077	64	1729	5.6
Honduras	2289.03	60.17	22.517	9746117	75.3	5728	6.6
Hungary	8178.03	299.68	41.678	9769949	76.9	32623	12
Iceland	1798.24	7.96	35.995	361313	83	55874	12.8
India	1828.18	20.2	26.767	1366417754	69.7	6754	6.5
Indonesia	637.62	17.66	28.528	270625568	71.7	11812	8.2
Iran (Islamic Republic of)	3292.52	91.94	29.693	82913906	76.7	14536	10.3
Iraq	2841.51	39.77	19.98	39309783	70.6	10881	7.3
Ireland	5141.16	99.53	36.5	4941444	82.3	86781	12.7
Israel	9695.08	73.83	30.243	9053300	83	40162	13
Italy	6979.33	208.41	45.355	60297396	83.5	42413	10.4
Jamaica	1600.59	29.14	29.026	2948279	74.5	9761	9.7
Japan	543.84	9.16	46.352	126264931	84.6	41429	12.8
Jordan	7108.19	90.91	22.128	10101694	74.5	9906	10.5
Kazakhstan	2206.7	26.27	29.388	18513930	73.6	26351	11.9
Kenya	307.85	5.6	18.874	52573973	66.7	4330	6.6
Kuwait	6848.97	39.71	33.515	4207083	75.5	49846	7.3
Kyrgyzstan	1547.56	26.33	25.066	6456900	71.5	5253	11.1
Lao People's Democratic Republic	22.51	0.03	22.802	7169455	67.9	7826	5.3
Latvia	6716.29	118.94	42.636	1912789	75.3	30830	13
Lebanon	7852.29	111.8	27.628	6855713	78.9	14717	8.7
Lesotho	503.68	14.94	23.026	2125268	54.3	2768	6.5
Liberia	42.13	1.68	18.759	4937374	64.1	1428	4.8
Libya	2644.54	45	27.116	6777452	72.9	15174	7.6
Lithuania	9548.55	147.67	42.673	2786844	75.9	36975	13.1
Luxembourg	11050.8	129.05	39.274	619896	82.3	114482	12.3
Madagascar	145.19	2.78	18.745	26969307	67	1646	6.1
Malawi	178.86	6.03	17.198	18628747	64.3	1060	4.7
Malaysia	1466.22	6.02	28.177	31949777	76.2	28351	10.4
Maldives	8501.81	18.68	28.593	530953	78.9	18914	7
Mali	70.09	2.52	15.973	19658031	59.3	2327	2.4
Malta	5924.24	81.04	41.063	502653	82.5	43340	11.3
Mauritania	405.58	9.83	19.619	4525696	64.9	5197	4.7
Mauritius	101.28	1.34	35.555	1265711	75	22989	9.5
Mexico	1847.41	170.97	27.665	127575529	75	19746	8.8
Mongolia	1500.02	6.53	27.081	3225167	69.9	12310	10.3
Montenegro	15745.3	248.54	37.656	622137	76.9	21379	11.6
Morocco	1395.33	24.67	27.901	36471769	76.7	7515	5.6
Mozambique	225.44	2.65	17.099	30366036	60.9	1280	3.5
Myanmar	263	5.91	27.458	54045420	67.1	5142	5
Namibia	2022.51	28.45	21.107	2494530	63.7	9637	7
Nepal	1593.24	17.9	22.234	28608710	70.8	3417	5
Netherlands	9197.1	100.28	42.07	17332850	82.3	57141	12.4
New Zealand	47.63	0.54	37.266	4917000	82.3	42888	12.8
Nicaragua	85.27	2.78	24.629	6545502	74.5	5407	6.9
Niger	22.06	0.79	14.938	23310715	62.4	1219	2.1
Nigeria	80.42	1	17.852	200963599	54.7	5136	6.7
North Macedonia	7426.63	251.03	37.437	2083459	75.8	16506	9.8
Norway	2221.8	14.42	39.154	5347896	82.4	63633	12.9
Oman	4039.79	43.2	28.998	4974986	77.9	27896	9.7
Pakistan	398.55	8.88	21.782	216565318	67.3	4690	5.2
Panama	8595.53	145.92	28.412	4246439	78.5	31459	10.2
Papua New Guinea	158.78	1.52	21.544	8776109	64.5	4388	4.7
Paraguay	4395.73	106.5	24.685	7044636	74.3	12685	8.5
Peru	5729.29	200.84	27.494	32510453	76.7	12848	9.7
Philippines	1049.38	17.58	24.08	108116615	71.2	8908	9.4
Poland	7526.51	189.47	39.727	37970874	78.7	33086	12.5
Portugal	8181.71	165.2	43.902	10269417	82	34798	9.3
Qatar	7409.96	18.47	31.459	2832067	80.2	92651	9.7
Romania	5547.62	152.99	41.255	19356544	76	29909	11.1
Russian Federation	3397.25	79.88	38.649	144373535	72.6	27044	12.2
Rwanda	202.4	2.66	19.449	12626950	69	2226	4.4
Sao Tome and Principe	1063.16	15.97	18.251	215056	70.4	3964	6.4
Saudi Arabia	1246.57	20.61	29.984	34268528	75.1	46962	10.2
Senegal	244.1	6.73	18.074	16296364	67.9	3395	3.2
Serbia	10207.4	96.67	40.546	6944975	76	18180	11.2
Seychelles	10009.5	35.59	32.827	97625	73.4	29056	10
Sierra Leone	51.51	0.99	18.736	7813215	54.7	1718	3.7
Singapore	1053.15	0.53	39.709	5703569	83.6	97341	11.6
Slovakia	7107.02	224.41	39.168	5454073	77.5	32793	12.7
Slovenia	11900.8	221.96	43.023	2087946	81.3	38689	12.7
South Africa	2723.86	93.17	26.352	58558270	64.1	12482	10.2
Spain	7639.26	167.82	42.488	47076781	83.6	40883	10.3
Sri Lanka	678.09	4.58	32.276	21803000	77	13078	10.6
Sudan	79.57	5.58	18.893	42813238	65.3	3958	3.8
Suriname	2037.05	38.87	27.864	581363	71.7	16329	9.3
Sweden	10042.3	138.22	40.874	10285453	82.8	53205	12.5
Switzerland	7846.42	117.05	42.21	8574832	83.8	68628	13.4
Tajikistan	143.79	0.95	22.044	9321018	71.1	3380	10.7
Thailand	162.69	0.93	37.859	69625582	77.2	18463	7.9
Timor-Leste	348.06	0.76	19.59	1293119	69.5	3123	4.8
Togo	160.4	1.51	18.799	8082366	61	1596	5
Trinidad and Tobago	1161.5	20.36	33.848	1394973	73.5	26176	11
Tunisia	2770.82	100.68	31.307	11694719	76.7	10756	7.2
Turkey	6079.68	53.34	29.868	83429615	77.7	28167	8.1
Uganda	93.7	0.76	15.895	44269594	63.4	2181	6.2
Ukraine	4939.19	110.83	40.005	44385155	72.1	12810	11.4
United Arab Emirates	5534.77	16.51	32.62	9770529	78	67119	12.1
United Kingdom	6559.17	188.09	40.012	66834405	81.3	46699	13.2
United States of America	9855.88	175.37	37.565	328239523	78.9	62683	13.4
Uruguay	6923.74	99.58	35.014	3461734	77.9	21561	8.9
Uzbekistan	290.02	2.01	26.164	33580650	71.7	6999	11.8
Viet Nam	4.5	0.04	30.504	96462106	75.4	8041	8.3
Zambia	502.94	6.86	16.708	17861030	63.9	3479	7.2
Zimbabwe	259.52	10.64	18.405	14645468	61.5	2836	8.5

## Sheet: freedom
Country	cases	deaths	FREEDOM
Albania	4587.95	84.61	7.81
Algeria	286.16	7.71	5.2
Angola	93.67	2.06	5.48
Argentina	7317.69	156.04	7.05
Armenia	7462.76	146.66	7.69							Sütun 1	Sütun 2	Sütun 3
Australia	117.56	3.57	8.68						Sütun 1	1
Austria	7116.73	114.91	8.45						Sütun 2	0.793142	1
Azerbaijan	3257.36	47.26	6.29						Sütun 3	0.545719	0.503913	1
Bahamas	2854.46	56.2	7.72
Bahrain	11904	44.19	6.18
Bangladesh	474.14	7.4	5.67
Barbados	1380.77	16.01	6.99
Belarus	3995.33	28.69	6.67
Belgium	8964.2	214.56	8.28
Belize	3197.46	81.23	6.92
Benin	65.86	0.83	6.81
Bhutan	167.96	0.13	6.52
Bolivia (Plurinational State of)	2849.02	115.8	6.78
Bosnia and Herzegovina	6171.94	275.88	7.34
Botswana	2267.28	32.91	7.35
Brazil	7352.05	205	6.83
Brunei Darussalam	53.03	0.69	6.01
Bulgaria	5968.07	249.49	7.93
Burkina Faso	64.09	0.78	6.6
Burundi	36.61	0.05	5.42
Cabo Verde	5086.63	45.14	7.75
Cambodia	134.84	0.92	6.83
Cameroon	291.68	4.48	5.46
Canada	3520.15	66.1	8.64
Central African Republic	145.14	1.99	5.25
Chad	29.86	1.05	5.59
Chile	6759.17	146.13	8.18
China	7.12	0.33	6.07
Colombia	6128.63	159.78	6.85
Congo	205.56	2.68	5.51
Costa Rica	5639.92	70.53	7.84
Croatia	8649.16	191.34	7.92
Cyprus	8021.46	39.08	8.05
Czechia	15468.8	279.91	8.29
Democratic Republic of the Congo	34.18	0.87	5.29
Denmark	4591.27	42.99	8.73
Dominican Republic	2561.96	33.08	7.37
Ecuador	2328.79	112.15	7.14
Egypt	241.28	14.06	4.67
El Salvador	1102.02	33.78	7.03
Estonia	9593.85	92.48	8.54
Ethiopia	231.94	3.49	5.4
Fiji	19.41	0.45	6.98
Finland	1630.77	16.85	8.49
France	8895.92	164.58	8.05
Gabon	1074.21	6.51	6.14
Gambia	246.5	7.24	6.27
Georgia	8333.58	112.78	7.87
Germany	4332.33	103.86	8.52
Ghana	300.37	2.52	7.04
Greece	3531.12	107.02	7.38
Guatemala	1348.15	44.06	7.21
Guinea	173.38	1.16	5.45
Guinea-Bissau	190.35	3.4	6.15
Guyana	1941.51	43.35	7
Haiti	118.57	2.4	6.68
Honduras	2289.03	60.17	6.94
Hungary	8178.03	299.68	7.61
Iceland	1798.24	7.96	8.39
India	1828.18	20.2	6.43
Indonesia	637.62	17.66	7.07
Iran (Islamic Republic of)	3292.52	91.94	4.53
Iraq	2841.51	39.77	4.9
Ireland	5141.16	99.53	8.62
Israel	9695.08	73.83	7.44
Italy	6979.33	208.41	8.12
Jamaica	1600.59	29.14	7.44
Japan	543.84	9.16	8.49
Jordan	7108.19	90.91	6.92
Kazakhstan	2206.7	26.27	6.99
Kenya	307.85	5.6	6.75
Kuwait	6848.97	39.71	6.39
Kyrgyzstan	1547.56	26.33	7.05
Lao People's Democratic Republic	22.51	0.03	6.16
Latvia	6716.29	118.94	8.34
Lebanon	7852.29	111.8	6.7
Lesotho	503.68	14.94	6.6
Liberia	42.13	1.68	6.4
Libya	2644.54	45	4.83
Lithuania	9548.55	147.67	8.37
Luxembourg	11050.8	129.05	8.49
Madagascar	145.19	2.78	6.54
Malawi	178.86	6.03	6.57
Malaysia	1466.22	6.02	6.9
Mali	70.09	2.52	5.92
Malta	5924.24	81.04	8.33
Mauritania	405.58	9.83	5.39
Mauritius	101.28	1.34	7.55
Mexico	1847.41	170.97	6.85
Mongolia	1500.02	6.53	7.61
Montenegro	15745.3	248.54	7.46
Morocco	1395.33	24.67	6.28
Mozambique	225.44	2.65	6.64
Myanmar	263	5.91	5.45
Namibia	2022.51	28.45	6.92
Nepal	1593.24	17.9	6.76
Netherlands	9197.1	100.28	8.48
New Zealand	47.63	0.54	8.87
Nicaragua	85.27	2.78	6.54
Niger	22.06	0.79	5.97
Nigeria	80.42	1	6.05
North Macedonia	7426.63	251.03	7.4
Norway	2221.8	14.42	8.45
Oman	4039.79	43.2	6.03
Pakistan	398.55	8.88	5.64
Panama	8595.53	145.92	7.87
Papua New Guinea	158.78	1.52	6.72
Paraguay	4395.73	106.5	7.19
Peru	5729.29	200.84	7.68
Philippines	1049.38	17.58	6.9
Poland	7526.51	189.47	7.72
Portugal	8181.71	165.2	8.27
Qatar	7409.96	18.47	6.07
Romania	5547.62	152.99	8.09
Russian Federation	3397.25	79.88	6.31
Rwanda	202.4	2.66	6.97
Saudi Arabia	1246.57	20.61	5.29
Senegal	244.1	6.73	6.66
Serbia	10207.4	96.67	7.34
Seychelles	10009.5	35.59	7.34
Sierra Leone	51.51	0.99	6.21
Singapore	1053.15	0.53	8.21
Slovakia	7107.02	224.41	7.95
Slovenia	11900.8	221.96	8.05
South Africa	2723.86	93.17	7.07
Spain	7639.26	167.82	8.2
Sri Lanka	678.09	4.58	6.72
Sudan	79.57	5.58	4.01
Suriname	2037.05	38.87	7.31
Sweden	10042.3	138.22	8.52
Switzerland	7846.42	117.05	8.82
Tajikistan	143.79	0.95	5.77
Thailand	162.69	0.93	6.37
Timor-Leste	348.06	0.76	6.89
Togo	160.4	1.51	6.13
Trinidad and Tobago	1161.5	20.36	7.13
Tunisia	2770.82	100.68	6.04
Turkey	6079.68	53.34	6.27
Uganda	93.7	0.76	6.58
Ukraine	4939.19	110.83	6.45
United Arab Emirates	5534.77	16.51	6.17
United Kingdom	6559.17	188.09	8.44
United States of America	9855.88	175.37	8.44
Uruguay	6923.74	99.58	7.92
Viet Nam	4.5	0.04	6.25
Zambia	502.94	6.86	6.71
Zimbabwe	259.52	10.64	5.59

## Sheet: ineq
Country	cases	deaths	ineq
Albania	4587.95	84.61	10.9
Algeria	286.16	7.71	19.7
Angola	93.67	2.06	31.7
Argentina	7317.69	156.04	13.2
Armenia	7462.76	146.66	9.7
Australia	117.56	3.57	7.9
Austria	7116.73	114.91	6.9
Azerbaijan	3257.36	47.26	9.4
Bangladesh	474.14	7.4	23.7
Barbados	1380.77	16.01	15.9
Belarus	3995.33	28.69	6.3
Belgium	8964.2	214.56	7.7
Belize	3197.46	81.23	21.6
Benin	65.86	0.83	36.9
Bhutan	167.96	0.13	26.3
Bolivia (Plurinational State of)	2849.02	115.8	23.7
Bosnia and Herzegovina	6171.94	275.88	14.2
Brazil	7352.05	205	24.4
Bulgaria	5968.07	249.49	11.3
Burkina Faso	64.09	0.78	29.5
Burundi	36.61	0.05	29.6
Cambodia	134.84	0.92	19.9
Cameroon	291.68	4.48	33.4
Canada	3520.15	66.1	8.4
Central African Republic	145.14	1.99	41.3
Chad	29.86	1.05	37.4
Chile	6759.17	146.13	15.9
China	7.12	0.33	15.7
Colombia	6128.63	159.78	21.6
Comoros	452.28	16.79	44.2
Congo	205.56	2.68	24.9
Costa Rica	5639.92	70.53	17.5
Croatia	8649.16	191.34	7.9
Cyprus	8021.46	39.08	9.1
Czechia	15468.8	279.91	4.4
Democratic Republic of the Congo	34.18	0.87	30.2
Denmark	4591.27	42.99	6
Dominican Republic	2561.96	33.08	21.1
Ecuador	2328.79	112.15	18.4
Egypt	241.28	14.06	28.7
El Salvador	1102.02	33.78	21.1
Estonia	9593.85	92.48	6.9
Ethiopia	231.94	3.49	27.3
Finland	1630.77	16.85	5.3
France	8895.92	164.58	8.9
Gabon	1074.21	6.51	22.5
Gambia	246.5	7.24	31.2
Georgia	8333.58	112.78	11.5
Germany	4332.33	103.86	7.9
Ghana	300.37	2.52	27.8
Greece	3531.12	107.02	10.8
Guatemala	1348.15	44.06	26.9
Guinea	173.38	1.16	33.1
Guinea-Bissau	190.35	3.4	37.4
Guyana	1941.51	43.35	18.3
Haiti	118.57	2.4	40
Honduras	2289.03	60.17	24.8
Hungary	8178.03	299.68	7.3
Iceland	1798.24	7.96	5.6
India	1828.18	20.2	25.7
Indonesia	637.62	17.66	17.7
Iran (Islamic Republic of)	3292.52	91.94	11.3
Iraq	2841.51	39.77	19.4
Ireland	5141.16	99.53	7.2
Israel	9695.08	73.83	10.9
Italy	6979.33	208.41	11.8
Jamaica	1600.59	29.14	15.9
Japan	543.84	9.16	8.1
Jordan	7108.19	90.91	14.6
Kazakhstan	2206.7	26.27	7.1
Kenya	307.85	5.6	26.2
Kyrgyzstan	1547.56	26.33	9.5
Lao People's Democratic Republic	22.51	0.03	24.7
Latvia	6716.29	118.94	9.2
Lesotho	503.68	14.94	27.4
Liberia	42.13	1.68	31.8
Lithuania	9548.55	147.67	10
Luxembourg	11050.8	129.05	9.6
Madagascar	145.19	2.78	26
Malawi	178.86	6.03	28.6
Maldives	8501.81	18.68	20.4
Mali	70.09	2.52	32.4
Malta	5924.24	81.04	7.9
Mauritania	405.58	9.83	31.8
Mauritius	101.28	1.34	13.6
Mexico	1847.41	170.97	20.8
Mongolia	1500.02	6.53	14
Montenegro	15745.3	248.54	9.4
Mozambique	225.44	2.65	30.7
Namibia	2022.51	28.45	33.6
Nepal	1593.24	17.9	24.9
Netherlands	9197.1	100.28	6.9
New Zealand	47.63	0.54	7.5
Nicaragua	85.27	2.78	23.2
Niger	22.06	0.79	27.4
Nigeria	80.42	1	35.2
North Macedonia	7426.63	251.03	11.8
Norway	2221.8	14.42	6
Oman	4039.79	43.2	12.9
Pakistan	398.55	8.88	30.2
Panama	8595.53	145.92	20.1
Papua New Guinea	158.78	1.52	29.6
Paraguay	4395.73	106.5	22.8
Peru	5729.29	200.84	18.8
Philippines	1049.38	17.58	17.8
Poland	7526.51	189.47	7.6
Portugal	8181.71	165.2	11.8
Romania	5547.62	152.99	11.4
Russian Federation	3397.25	79.88	10
Rwanda	202.4	2.66	28.4
Sao Tome and Principe	1063.16	15.97	16.7
Senegal	244.1	6.73	31.2
Serbia	10207.4	96.67	12.1
Seychelles	10009.5	35.59	15.2
Sierra Leone	51.51	0.99	34.5
Singapore	1053.15	0.53	12.8
Slovakia	7107.02	224.41	6.1
Slovenia	11900.8	221.96	4.6
South Africa	2723.86	93.17	31.2
Spain	7639.26	167.82	13.1
Sri Lanka	678.09	4.58	13.8
Sudan	79.57	5.58	34.3
Suriname	2037.05	38.87	26
Sweden	10042.3	138.22	6.5
Switzerland	7846.42	117.05	6.8
Tajikistan	143.79	0.95	12.4
Thailand	162.69	0.93	16.7
Timor-Leste	348.06	0.76	26.7
Togo	160.4	1.51	31.7
Tunisia	2770.82	100.68	18.9
Turkey	6079.68	53.34	16.5
Uganda	93.7	0.76	26.7
Ukraine	4939.19	110.83	6.5
United Kingdom	6559.17	188.09	7.9
United States of America	9855.88	175.37	12.1
Uruguay	6923.74	99.58	12.6
Viet Nam	4.5	0.04	16.5
Zambia	502.94	6.86	30.6
Zimbabwe	259.52	10.64	22.5

## Sheet: correlation
	Cases	Deaths	Number of Countries
age	0.655417	0.622287	160
pop	-0.0940284	-0.0596412	160
lexp	0.607816	0.511955	160
gdp_pp	0.534482	0.334497	160
sch	0.611028	0.533282	160
ineq	-0.639545	-0.540564	139

## Sheet: Definition
Variable	Abbreviation	Year	Source	Access Date	Access Link
Covid-19 Cases (cumulative total per 100000 population)	cases	2021	World Health Organization	2021-05-19	https://covid19.who.int/
Covid-19 Deaths (cumulative total per 100000 population)	deaths	2021	World Health Organization	2021-05-19	https://covid19.who.int/
Avarage Age of Countries	age	2015	United Nations	2021-05-19	https://population.un.org/wpp/DataQuery/
Total Population	pop	2019	World Bank	2021-05-19	https://data.worldbank.org/indicator/SP.POP.TOTL
Life Expectancy	lexp	2019	United Nations Development Programme	2021-05-19	http://hdr.undp.org/en/indicators/69206
GDP Per Capita	gdp_pp	2019	United Nations Development Programme	2021-05-19	http://hdr.undp.org/en/indicators/194906
Mean Years of Schooling	sch	2019	United Nations Development Programme	2021-05-19	http://hdr.undp.org/en/indicators/69706
Coefficient of Human Inequality	ineq	2019	United Nations Development Programme	2021-05-19	http://hdr.undp.org/en/indicators/135006
